# Supplementary material for: A harmonized public resource of deeply sequenced diverse human genomes
Source: PubMed Central journal article supplement — Genome Res. 2024 May;34(5):796–809. doi: 10.1101/gr.278378.123 (PMC11216312; doi:10.1101/gr.278378.123), 2024-05
Supplement: Supplemental_Documents_.pdf [file Supplemental_Documents_.pdf]

## Phased HGDP+1kGP haplotypes - utilized pedigree information to improve phasing

URL for:

- GCS  
gs://gcp-public-data--gnomad/resources/hgdp\_1kg/phased\_haplotypes\_v2
- Amazon  
s3://gnomad-public-us-east-1/resources/hgdp\_1kg/phased\_haplotypes\_v2
- Microsoft  
[https://datasetgnomad.blob.core.windows.net/dataset/resources/hgdp\\_1kg/phased\\_haplotypes\\_v2](https://datasetgnomad.blob.core.windows.net/dataset/resources/hgdp_1kg/phased_haplotypes_v2)

More information: <https://gnomad.broadinstitute.org/downloads#v3-hgdp-1kg-tutorials>

Contact: Lindo Nkambule ([lnkambul@broadinstitute.org](mailto:lnkambul@broadinstitute.org))
