# Supplementary material for: A harmonized public resource of deeply sequenced diverse human genomes
Source: HighWire-hosted journal article supplement (doi:10.1101/gr.278378.123), 2024-05-01
Supplement: Supplemental_Tables.xlsx [file Supplemental_Tables.xlsx]

## Sheet: README
Supplementary table	Table title	Expanded description
Table S1	Harmonization of HGDP and 1000 Genomes Project meta-data project labels.	These labels are referred to as geographical/genetic regions throughout this manuscript. The sample sizes included here are pre-QC. Post-QC numbers are shown in Table S3.
Table S2	Genetic outliers identified in analysis of global and subcontinental PCA.	Within subcontinental PCA biplots, outliers were identified when one to three samples defined most of an entire PC among PCs 1-6.
Table S3	Final sample counts.	Note: hard filtering was performed as in gnomAD v3 with modifications as described below in Quality Control. The first row of the “Total” column includes a “synthetic diploid” QC sample (CHM; Complete Hydatidiform Mole) described previously (Li et al. 2018). It was removed during initial QC together with 31 samples that failed gnomAD's sample QC hard filters and two contaminated samples, and is e…
Table S4	Coverage as well as SNV and SV statistics by population.	Coverage was computed across the genome as part of the gnomAD project. Relatedness was inferred using KING-robust. Because number of variants and singleton counts per individual are sensitive to sample size imbalances, they were tallied using a downsampled version of the dataset in which each population was randomly downsampled to match the smallest population (i.e. 4 individuals per population),…
Table S5	Sex chromosome aneuploidies in the HGDP samples.
Table S6	SV calls by external support from the HGSV study.
Table S7	Populations interspersed among other geographical/genetic regions obtained from the pairwise F_ST heatmap, colored by region.
Table S8	Pearson correlation and Mantel tests results with and without waypoints.	Waypoints and calculations are described further in Methods (“F_ST versus geographical distance”).
Table S9	gnomAD Sample and Variant Quality Control Steps.	This table contains the steps conducted by the gnomAD team on the jointly called HGDP+1kGP dataset. These QC steps were conducted prior to the additional quality control steps we conducted as outlined in the methods section. Samples and variants that passed gnomAD’s QC were labeled as PASS. For additional details on the QC steps conducted, see the gnomAD blogpost on the release of the HGDP+1kGP d…
Table S10	Filters Applied to Comparison Datasets.	For each dataset, the filter name is written along with the number of variants removed by that filter. Phase3 1kGP is not included in this table as there were no filters listed for that dataset.
Table S11	Variants absent in HGDP+1kGP that were identified in comparison datasets depending on whether variants passed QC in each dataset.	The numbers in this table are the counts of variants which are only in the comparison datasets, listed in the first column. Counts were generated by taking the disjoint subset of the pre- and post-QC HGDP+1kGP dataset with both the pre- and post-QC versions of the comparison dataset. For the comparison datasets, QC is defined as applying the filters supplied by the datasets as in Table S10 as wel…
Table S12	Variant counts and percentages of comparison datasets.	The number of variants in are calculated for each minor allele frequency (MAF) bin. The MAF is represented as the MAF in the HGDP+1kGPd dataset. Variants with a MAF of 0% are not in the HGDP+1kGP dataset. For each comparison dataset there are counts for the number of variants in the comparison dataset only, in both the comparison dataset and HGDP+1kGP, and in HGDP+1kGP only. For each dataset at t…
Table S13	Shrinkage analysis matches and no classification numbers by SNP missingness in the test dataset, as shown in Figure S20.	There were no mismatched labels assigned.

## Sheet: Table_S1
Table S1 | Harmonization of HGDP and 1000 Genomes Project meta-data project labels.
1000 Genomes super population	HGDP region	Combined label (geographical/genetic region)	Sample size (pre-QC)
AFR	AFRICA	AFR	1003
AMR	AMERICA	AMR	552
SAS	CENTRAL_SOUTH_ASIA	CSA	790
EAS	EAST_ASIA	EAS	825
EUR	EUROPE	EUR	788
N/A	MIDDLE_EAST	MID	162
N/A	OCEANIA	OCE	30

## Sheet: Table_S2
Table S2 | Genetic outliers identified in analysis of global and subcontinental PCA.
Sample ID	Region	Population
HG01880	AFR	ACB
HG01881	AFR	ACB
NA20274	AFR	ASW
NA20299	AFR	ASW
NA20314	AFR	ASW
HGDP00013	CSA	Brahui
HGDP00029	CSA	Brahui
HGDP00057	CSA	Balochi
HGDP00130	CSA	Makrani
HGDP00150	CSA	Makrani
HGDP00175	CSA	Sindhi
HGDP01298	EAS	Uygur
HGDP01300	EAS	Uygur
HGDP01303	EAS	Uygur
LP6005443-DNA_B02	EAS	Uygur
HG01628	EUR	IBS
HG01629	EUR	IBS
HG01630	EUR	IBS
HG01694	EUR	IBS
HG01696	EUR	IBS
HGDP00621	MID	Bedouin
HGDP01270	MID	Mozabite
HGDP01271	MID	Mozabite

## Sheet: Table_S3
Table S3 | Final sample counts.
	HGDP	1kGP	Total
Initial dataset	948	3202	4151
Hard filtered	941	3176	4117
PCA outliers removed	928	3166	4094
Unrelated individuals	880	2520	3400

## Sheet: Table_S4
Table S4 | Coverage as well as SNV and SV statistics by population.
			Sample Count/Population			Geographical Location			Coverage		Number of Singletons/Individual		Number of SNPs/Individual		Number of SVs/Individual		Population Heterozygosity		Number of Indels/Individual
Project	Genetic/Geographical Region	Population	All	Unrelateds	Relateds	Latitude	Longitude	Number of Downsampled Individuals	Mean	SD	Mean	SD	Mean	SD	Mean	SD	Mean	SD	Mean	SD
1kGP	AFR	ACB	116	95	21	13.1	-59.6167	4	31.472	0.10553	451650	4794.5	5884700	67300	10468	76.54	0.066853	0.14131	1269300	12328
1kGP	AFR	ASW	74	55	19	35.4817	-97.5333	4	31.796	0.66762	418720	5494.7	5815200	52063	10566	144.76	0.066678	0.14122	1259600	17827
HGDP	AFR	BantuKenya	12	10	2	-3	37	4	30.55	0.48138	478020	5108.3	5815300	13599	9582.8	56.99	0.06514	0.14075	923480	5620.6
HGDP	AFR	BantuSouthAfrica	8	8	0	-25.6	24.25	4	39.516	14.43	617730	18029	5968600	66537	9904.5	193.04	0.067373	0.1424	1034600	154270
HGDP	AFR	Biaka	26	22	4	4	17	4	30.984	1.9707	848610	5373.7	6124700	53139	10575	559.29	0.06835	0.14317	938290	18567
1kGP	AFR	ESN	148	103	45	9.06667	7.48333	4	35.044	4.5024	425880	1129.7	5997500	51230	10665	300.89	0.066363	0.14166	1305700	17178
1kGP	AFR	GWD	176	116	60	13.4667	-16.6	4	31.202	0.80206	480560	5444.5	5984100	65906	10815	393.64	0.066474	0.14154	1287400	28584
1kGP	AFR	LWK	97	90	7	-1.26667	36.8	4	33.466	4.4992	539150	3690.2	5960500	41099	11140	317.58	0.06745	0.14176	1287100	24606
1kGP	AFR	MSL	98	83	15	8.48445	-13.2345	4	31.317	0.68161	563120	1840.6	6013500	68004	11345	453.59	0.064067	0.14086	1295000	14552
HGDP	AFR	Mandenka	23	20	3	12	-12	4	32.464	2.7866	432440	1941	5831600	44271	9755.5	326.35	0.065139	0.14181	1014600	139760
HGDP	AFR	Mbuti	14	10	4	1	29	4	40.373	12.186	862740	10389	6336300	80745	10358	140.7	0.067558	0.1422	1164800	138750
HGDP	AFR	San	6	6	0	-21	20	4	40.161	13.908	1395000	14130	6486600	50913	10475	256.51	0.066272	0.14226	1147300	165280
1kGP	AFR	YRI	175	117	58	7.39667	3.91667	4	30.566	1.5343	430800	3325.5	5979500	70031	10935	314.23	0.064524	0.14022	1282000	33179
HGDP	AFR	Yoruba	21	21	0	8	5	4	28.595	0.78117	400850	4977.9	5892200	9060.4	9545.3	105.35	0.066562	0.14164	885640	7380.2
1kGP	AMR	CLM	130	95	35	4.58333	-74.0667	4	33.261	1.6835	224970	4483.1	5249900	68185	9243.5	202.13	0.054335	0.13262	1148400	19931
HGDP	AMR	Colombian	7	6	1	3	-68	4	33.913	2.5805	153520	2506.4	5157700	66631	8245.5	458.34	0.040281	0.11954	985720	124590
HGDP	AMR	Karitiana	12	7	5	-10	-63	4	34.951	1.2804	113080	5007.9	5166500	53954	8115.8	383.06	0.03765	0.11674	1041500	102110
1kGP	AMR	MXL	97	63	34	19.4333	-99.1333	4	29.94	1.1847	199310	3200.3	5116900	46673	9080	269.87	0.042557	0.12193	1104800	15693
HGDP	AMR	Maya	21	21	0	19	-91	4	35.174	3.0792	177670	1674.4	5157200	75877	8452.3	570.66	0.051655	0.13065	1026700	136360
1kGP	AMR	PEL	122	85	37	-12.0417	-77.0283	4	33.268	3.4367	179680	2148.2	5150600	43470	8638.8	254.65	0.044652	0.12395	1117400	11263
1kGP	AMR	PUR	138	104	34	18.45	-66.1	4	31.847	1.1034	224500	5020	5205200	27089	9225	278.17	0.039184	0.11846	1115900	16376
HGDP	AMR	Pima	14	10	4	29	-108	4	33.665	1.729	117380	1621	5132000	67695	8189.3	442.73	0.054272	0.13239	1011400	125980
HGDP	AMR	Surui	8	4	4	-11	-62	4	35.854	0.99567	69612	2640.6	5161600	58405	7976.3	332.31	0.033531	0.11138	1010500	103730
1kGP	CSA	BEB	131	99	32	23.7	90.35	4	31.058	0.31644	289100	906.99	5163300	23740	8909.3	271.43	0.049686	0.12933	1109100	14812
HGDP	CSA	Balochi	24	24	0	30.5	66.5	4	30.437	1.737	206700	6596.4	5051300	34550	8584.8	287.36	0.051527	0.13074	960310	155320
HGDP	CSA	Brahui	25	25	0	30.5	66.5	4	32.734	3.0484	191860	2283	5011100	59445	8346	278.97	0.049559	0.12923	874060	196140
HGDP	CSA	Burusho	24	24	0	36.5	74	4	29.016	2.7897	228670	1247.4	5039300	60171	8170.5	288.21	0.050021	0.12962	905470	99816
1kGP	CSA	GIH	103	100	3	23.2167	72.6833	4	31.163	0.7099	266130	1062	5166100	47545	8951.8	264.89	0.051245	0.13043	1112900	11228
HGDP	CSA	Hazara	20	18	2	33.5	70	4	30.814	1.4947	196680	590.08	5050800	31070	8676.5	460.98	0.050053	0.12935	976010	118430
1kGP	CSA	ITU	106	102	4	17.366	78.476	4	34.585	4.3879	290840	6355.1	5171800	54352	8899.3	85.33	0.051687	0.13098	1119400	24627
HGDP	CSA	Kalash	23	21	2	36	71.5	4	30.278	1.2926	168160	3167.8	5012700	52042	8482.8	433.73	0.047298	0.12726	959600	123640
HGDP	CSA	Makrani	25	25	0	26	64	4	32.228	3.0145	212340	2366.5	5045500	36925	8484	162.62	0.050622	0.12981	969680	135540
1kGP	CSA	PJL	145	102	43	31.55	74.3417	4	32.335	0.95994	253240	3262.8	5150200	17642	8898.5	266.55	0.049779	0.12968	1117500	8970.1
HGDP	CSA	Pathan	24	24	0	33.5	70.5	4	34.892	2.4302	231890	3351.2	5044200	34886	8355.5	656.79	0.051218	0.13052	882890	122190
1kGP	CSA	STU	114	101	13	6.9	79.9	4	30.811	0.53535	306440	1901.4	5200600	13420	8834	133.6	0.050095	0.12982	1117800	23700
HGDP	CSA	Sindhi	24	24	0	25.5	69	4	33.867	1.8452	237280	2044.3	5077200	18000	8318	525.72	0.051488	0.13063	855740	93889
1kGP	EAS	CDX	93	90	3	22	100.8	4	33.319	2.9473	228220	3111.6	5254600	32225	8647.8	284.4	0.046869	0.12677	1147300	21981
1kGP	EAS	CHB	103	103	0	39.9133	116.392	4	31.769	1.711	210680	1805.9	5235200	31915	8870	225.59	0.046412	0.12586	1137600	11857
1kGP	EAS	CHS	163	103	60	23.1333	113.267	4	31.214	1.6376	217000	2903.2	5211200	49126	8767.8	259.75	0.04691	0.12629	1131000	16095
HGDP	EAS	Cambodian	10	10	0	12	105	4	33.597	4.5365	268650	5646.9	5160100	64922	8276.5	508.78	0.046833	0.12635	974170	105670
HGDP	EAS	Dai	9	8	1	21	100	4	30.559	1.2314	213930	2296.5	5112900	14122	9203.8	132.68	0.045818	0.12533	1058500	9966.6
HGDP	EAS	Daur	9	9	0	48.5	124	4	32.681	1.8782	181470	1845.2	5083300	37432	8116	485.44	0.046114	0.12617	887890	145940
HGDP	EAS	Han	33	33	0	32.3	114	4	31.338	2.507	211610	2630.3	5154300	16061	8896.3	348.17	0.046538	0.126	1081300	19858
HGDP	EAS	Hezhen	9	8	1	47.5	133.5	4	31.115	2.591	196640	2020.3	5151400	28944	9221.8	230.57	0.046697	0.12627	1063500	24818
1kGP	EAS	JPT	102	102	0	35.6833	139.683	4	31.484	1.2798	232520	626.98	5225600	35482	8816.5	251.58	0.045761	0.1252	1135300	17004
HGDP	EAS	Japanese	29	28	1	37.5	139	4	28.412	1.7925	214160	662.68	5093500	54863	8588.3	487.01	0.046492	0.12587	1023300	25561
1kGP	EAS	KHV	122	101	21	10.7767	106.682	4	31.644	0.92	234680	1299.9	5211900	51212	8727	167.99	0.047154	0.12648	1128600	12560
HGDP	EAS	Lahu	8	8	0	22	100	4	31.459	1.642	174640	2750.4	5142200	8838.1	9080.5	245.12	0.045083	0.12499	1075400	8587.6
HGDP	EAS	Miao	10	10	0	28	109	4	31.595	1.0789	195810	1361.6	5078400	37527	7995.8	384.83	0.04528	0.12531	863800	132090
HGDP	EAS	Mongolian	10	10	0	48.5	119	4	29.932	1.5139	186110	988.73	5055200	33564	8178.3	715.57	0.046531	0.12642	847010	112640
HGDP	EAS	Naxi	8	7	1	26	100	4	30.319	1.0784	196620	950.05	5127600	20095	9312	73.28	0.04635	0.12606	1067700	14208
HGDP	EAS	NorthernHan	10	10	0	34.7	107.8	4	31.002	1.5317	197660	1367.5	5154600	44403	8941.5	379.76	0.046611	0.12602	1075100	17432
HGDP	EAS	Oroqen	8	8	0	50.4	126.5	4	31.173	2.5154	178580	1989.1	5124400	34521	9371.3	104	0.046312	0.12594	1054300	35248
HGDP	EAS	She	10	9	1	27	119	4	35.223	6.4064	194830	2154.8	5137300	24986	9090.5	196.9	0.045573	0.12532	1083600	32611
HGDP	EAS	Tu	10	10	0	36	101	4	30.959	1.5428	196010	530.05	5128900	23706	8884.5	297	0.047163	0.12658	1074700	16233
HGDP	EAS	Tujia	10	10	0	29	109	4	32.739	0.75614	201390	655.32	5101000	36065	8015.8	351.27	0.04574	0.1258	878120	125520
HGDP	EAS	Uygur	10	10	0	44	81	4	31.35	2.0588	197730	1703.5	5069200	39956	8671.3	512.94	0.050027	0.12953	988470	125550
HGDP	EAS	Xibo	9	9	0	43.5	81.5	4	28.886	2.7099	190830	1278.5	5041100	45956	8118	748.39	0.046642	0.12658	839680	137790
HGDP	EAS	Yakut	25	25	0	63	129.5	4	32.592	0.26879	153940	567.91	5077200	29155	8145	381.93	0.04574	0.12588	855180	120270
HGDP	EAS	Yi	10	10	0	28	103	4	30.966	1.1413	198840	1780.7	5129700	5726	8721.3	292.65	0.04626	0.12592	1072600	11917
HGDP	EUR	Adygei	17	17	0	44	39	4	30.502	1.2372	202430	1758.4	5032700	54172	8623	584.94	0.049627	0.12927	955590	118280
HGDP	EUR	Basque	22	22	0	43	0	4	33.995	1.4969	153870	1103.7	4987300	16264	8732.5	269.22	0.047995	0.12764	1029900	12799
HGDP	EUR	BergamoItalian	11	11	0	46	10	4	33.345	2.6273	185740	1298.3	4996300	26427	8748.3	273.51	0.049065	0.12857	1033200	21138
1kGP	EUR	CEU	176	121	55	40.321	-111.094	4	31.025	2.3372	180840	1079.8	5046100	36397	8735	74.25	0.049746	0.1291	1089400	14020
1kGP	EUR	FIN	98	98	0	60.1683	24.935	4	32.093	1.6145	170020	949.59	5099700	8171.8	8587.8	172.83	0.049356	0.12872	1105900	9141.1
HGDP	EUR	French	27	27	0	46	2	4	36.519	3.4013	172930	896.71	4999500	44378	8649.3	351.41	0.049345	0.12873	959980	50871
1kGP	EUR	GBR	90	88	2	52.8333	-1.89167	4	30.368	1.4551	175360	1557.9	5026900	36819	9015.3	201.16	0.049464	0.12883	1077400	18364
1kGP	EUR	IBS	156	107	49	40.3833	-3.71667	4	31.822	1.6855	195630	1132.4	5068300	36959	8770	301.03	0.050377	0.1295	1099000	10680
HGDP	EUR	Orcadian	15	14	1	59	-3	4	33.295	1.443	170740	741.7	5069700	5516.5	8944.8	240.12	0.049167	0.12862	1053400	8300.7
HGDP	EUR	Russian	25	25	0	61	40	4	32.734	1.5022	175200	1699.6	5007300	42752	8858.8	280.49	0.049224	0.1287	1026800	20297
HGDP	EUR	Sardinian	27	27	0	40	9	4	30.944	1.9225	191860	1998.7	5015600	35933	8779.3	349.25	0.048659	0.12808	1024800	34813
1kGP	EUR	TSI	103	103	0	43.0667	12	4	32.284	1.4303	207760	1267.1	5119400	18455	8777.3	231.62	0.050045	0.12924	1103400	17077
HGDP	EUR	Tuscan	8	8	0	43	11	4	37.957	9.8893	202550	2411.9	5001200	31894	8676	233.8	0.049501	0.12892	1045400	46871
HGDP	MID	Bedouin	46	46	0	31	35	4	30.904	2.5247	252340	2699.8	5076400	95120	8288.3	421.11	0.049374	0.12875	854510	134790
HGDP	MID	Druze	42	40	2	32	35	4	33.585	4.472	225370	2070.2	5136600	49487	8549.8	538.56	0.049981	0.12928	1068100	41262
HGDP	MID	Mozabite	28	27	1	32	3	4	30.379	2.6403	242270	1709.3	5154700	71781	8430	736.93	0.053751	0.13273	866430	139810
HGDP	MID	Palestinian	45	40	5	32	35	4	34.911	2.5638	239180	4432.9	5097400	23894	8656.8	264.61	0.051277	0.13015	1071200	16011
HGDP	OCE	Bougainville	13	10	3	-6	155	4	34.219	0.42176	355650	4443.6	5280200	87472	8356.5	344.95	0.042676	0.12164	986450	140070
HGDP	OCE	PapuanHighlands	9	9	0	-6.1	145.4	4	54.983	15.294	322890	3989.8	5309900	32323	8112	66.39	0.039732	0.11834	1035000	156000
HGDP	OCE	PapuanSepik	8	8	0	-4	143	4	39.007	15.203	314640	5144.2	5228500	65898	7809.8	187.96	0.037404	0.11749	870950	150350

## Sheet: Table_S5
Table S5 | ​​Sex chromosome aneuploidies in the HGDP samples.
Sample ID	Population	Geographical/Genetic region	Chr X	Chr Y	Assignment
HGDP00445	Burusho	CSA	1	0	XO
HGDP01157	Bergamo Italian	EUR	1	0	XO
HGDP01208	Oroquen	EAS	2	1	XXY
HGDP01368	Basque	EUR	1	0	XO
LP6005441-DNA_G09	Palestinian	MID	1	0	XO

## Sheet: Table_S6
Table S6 | SV calls by external support from the HGSV study.
		External Supports (Count SVs per genome)
SV type	Precision	No Support	Illumina	PacBio	Illumina and PacBio
DEL	0.9622	140	15	626	2918
DUP	0.9632	64	13	8512	808
INS	0.9619	136	3	1049	2390
INV	0.9662	1	1	0	13
CPX	0.7454	28	3	134	64
All SVs	0.9597	368	35	2541	6194

## Sheet: Table_S7
Table S7 | Populations interspersed among other geographical/genetic regions obtained from the pairwise F_ST heatmap, colored by region.
Population	Region	Cluster
Hazara	CSA	Part of CSA population cluster
Uygur	EAS	EAS population among CSA cluster
CLM	AMR	2 AMR populations among CSA cluster
PUR	AMR
Brahui	CSA	CSA population cluster
Balochi	CSA
Makrani	CSA
Burusho	CSA
Pathan	CSA
Sindhi	CSA
MXL	AMR	AMR population among CSA cluster
BEB	CSA	CSA population cluster
PJL	CSA
GIH	CSA
ITU	CSA
STU	CSA
Kalash	CSA	CSA population among EUR cluster
FIN	EUR	EUR population cluster
IBS	EUR
TSI	EUR
CEU	EUR
GBR	EUR
Basque	EUR
Sardinian	EUR
Druze	MID	MID population among EUR cluster
French	EUR	Part of EUR population cluster
Mozabite	MID	MID population among EUR cluster
Orcadian	EUR	EUR population cluster
BergamoItalian	EUR
Tuscan	EUR
Bedouin	MID	2 MID populations among EUR cluster
Palestinian	MID
Adygei	EUR	EUR population cluster
Russian	EUR
JPT	EAS	EAS population cluster
CHB	EAS
CHS	EAS
CDX	EAS
KHV	EAS
Lahu	EAS
Han	EAS
Japanese	EAS
Yakut	EAS
Dai	EAS
Miao	EAS
She	EAS
Naxi	EAS
NorthernHan	EAS
Tujia	EAS
Yi	EAS
Oroqen	EAS
Daur	EAS
Hezhen	EAS
Cambodian	EAS
Tu	EAS
Mongolian	EAS
Xibo	EAS
Surui	AMR	AMR population cluster
Karitiana	AMR
Pima	AMR
PEL	AMR
Colombian	AMR
Maya	AMR
ACB	AFR	AFR population cluster
ASW	AFR
LWK	AFR
ESN	AFR
YRI	AFR
GWD	AFR
MSL	AFR
Biaka	AFR
Mandenka	AFR
Yoruba	AFR
BantuKenya	AFR
BantuSouthAfrica	AFR
Mbuti	AFR	2 AFR populations cluster with OCE
San	AFR
Bougainville	OCE	OCE population cluster
PapuanHighlands	OCE
PapuanSepik	OCE

## Sheet: Table_S8
Table S8 | Pearson correlation and Mantel tests results with and without waypoints.
	With waypoints		Without waypoints
Projects	Pearson correlation coefficient	Mantel statistic	Pearson correlation coefficient	Mantel statistic
HGDP	0.761588	0.547157	0.709522	0.4504546
1kGP	0.3672138	0.116881	0.327703	0.1009129
Cross-project	0.450008	0.1925107	0.4119236	0.1549286
Everything	0.560658	0.308433	0.529062	0.2592783

## Sheet: Table_S9
Table S9 | gnomAD Sample and Variant Quality Control Steps
Sample QC Steps
Hard Filtering
Using sample QC metrics computed using Hail’s sample_qc() module on all autosomal bi-allelic SNVs the following filters were applied:
	Number of SNVs: < 2.4M or > 3.75M
	Number of singletons: >100k
	Ratio of heterozygous to homozygous variants: > 3.3
Hard filtering using BAM-level metrics was performed when such metrics were available. Removed samples with:
	Contamination: > 5%
	Chimeras: > 5%
	Median insert size: < 250
Sex Inference
Used a rough F-stat cutoff of 0.5 to split samples into XX and XY categories. Final X and Y ploidy cutoffs were determined from the means and standard deviations of those XX and XY distributions. Sex was assigned based on the following cutoffs:
XY:
	Normalized X coverage < 1.29 &
	Normalized Y coverage > 0.1 &
	Normalized Y coverage < 1.16
XX:
	Normalized X coverage > 1.45 &
	Normalized X coverage < 2.4 &
	Normalized Y coverage < 0.1
Ancestry inference
30 principal components (PCs) were computed using principal components analysis (PCA) using Hail’s hwer_normalized_pca() function. 76,419 high quality variants were selected for these analyses using the following selection criteria:
1.	Lifting over all sites from gnomAD v2.1 to GRCh38
2.	Add ~5k sites widely used for quality control of GWAS data defined by Shaun Purcell and lifted them over to GRCh38
3.	From the two above sets, selected all bi-allelic SNVs with an Inbreeding coefficient > -0.25 (no excess of heterozygotes)
The 30 PCs were visually inspected to determine which PCs were capturing variants explained by the available “known” population labels. The first 16 PCs were chosen as best capturing the global ancestry variation and then a random forest classifier was trained using those PCs as features on the samples with “known” population labels. Ancestry labels were then assigned to all samples for which the…
Sample QC metric outlier filtering
Computed sample QC metrics using Hail’s sample_q() module and regressed out the first 8 ancestry assignment PCs. Samples which fell outside the 4 median absolute deviations (MADs) from the median for the following metrics:
	Number snps
	Transition/transversion ratio
	Insertion/deletion ratio
	Number of insertions
	Number of deletions
	Number of heterozygotes
	Number of homozygous variants
	Number of transitions
	Number of transversions
Additionally filtered samples over 8 MADs above the median number of singletons and over 4 MADs above the median ratio of heterozygous/homozygous variants call ratio.
Variant QC Steps
Performed variant QC using the allele-specific version of GATK Variant Quality Score Recalibration (VQSR) with the following features:
	SNVs: AS_FS, AS_SOR, AS_ReadPosRankSum, AS_MQRankSum, AS_QD, AS_MQ
	Indels: AS_FS, AS_SOR, AS_ReadPosRankSum, AS_MQRankSum, AS_QD
The standard GATK training resources (HapMap, Omni, 1000 Genomes, Mills indels) were used in addition to ~19M transmitted singletons (alleles confidently observed exactly twice in gnomAD, once in a parent and once in a child) from 6,743 trios present in the raw data.
Variant hard filters
	No high-quality genotype (GQ >=20, DP>=10, and AB>=0.2 for heterozygotes) called for the variant
	Inbreeding Coefficient < -0.3

[truncated: 4 more sheets: Table_S10, Table_S11, Table_S12, Table_S13]
